# Supplementary material for: Occurrence of disinfectant-resistant bacteria in a fresh-cut vegetables processing facility and their role in protecting Salmonella enteritidis
Source: Royal Society of Chemistry journal article supplement (doi:10.1039/d0ra09325d), 2021-01-01
Supplement: d0ra09325d1.pdf [file d0ra09325d1.pdf]

## Supplementary materials for:

### **Occurrence of disinfectant-resistant bacteria in fresh-cut vegetables processing facility and the role in protecting *Salmonella* Enteritidis**

Jing-Guo Xu, Jiao Meng, Wen-Jing Bao, Jia-Mu Kang, Jing-Yu Chen, Bei-Zhong Han\*

Beijing Laboratory for Food Quality and Safety, College of Food Science & Nutritional Engineering, China Agricultural University, Beijing, 100083, China

\* Corresponding author

Corresponding author at: P.O. Box 398, 17 Qinghua East Rd., Beijing, 100083, China.

E-mail addresses: [hbz@cau.edu.cn](mailto:hbz@cau.edu.cn) (B. Z. Han), [B20183060526@cau.edu.cn](mailto:B20183060526@cau.edu.cn) (J. G. Xu)

Supplementary Table S1

Supplementary Figure S1

Table S1 Details information of the contact surface samples

| No.                       | Sampling location  | Processing room |
|---------------------------|--------------------|-----------------|
| Direct-contact surfaces   |                    |                 |
| 1                         | cutting board      | sorting room    |
| 2                         | trimming knife     | sorting room    |
| 3                         | trimming table     | sorting room    |
| 4                         | soaking bucket     | cleaning room   |
| 5                         | dewatering machine | cleaning room   |
| 6                         | conveyor           | cleaning room   |
| 7                         | washing sink       | cleaning room   |
| 8                         | conveyor           | cutting room    |
| 9                         | basket             | packaging room  |
| 10                        | packaging machine  | packaging room  |
| Indirect-contact surfaces |                    |                 |
| 11                        | tray               | sorting room    |
| 12                        | drain cover        | sorting room    |
| 13                        | table edge         | sorting room    |
| 14                        | electronic scale   | sorting room    |
| 15                        | dado               | sorting room    |
| 16                        | trolley            | sorting room    |
| 17                        | drain cover        | cleaning room   |
| 18                        | tools shelf        | cleaning room   |
| 19                        | metal detector     | packaging room  |
| 20                        | wall               | packaging room  |

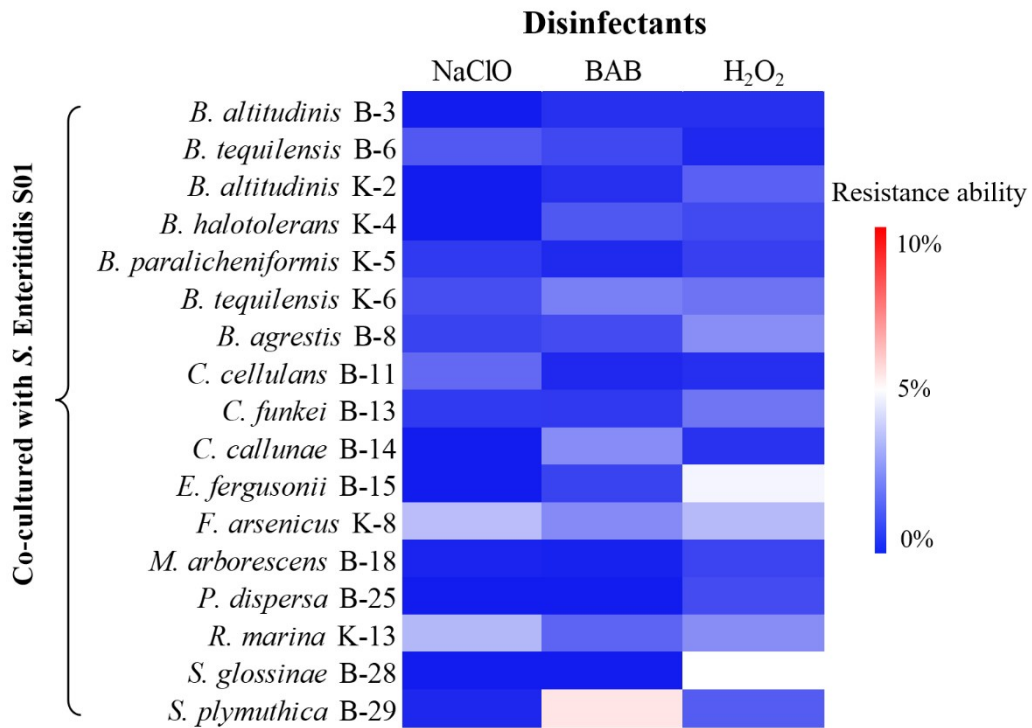

**Fig. S1** Disinfectant-resistance profiles of mixed-species biofilms formed by *Salmonella* Enteritidis S01 and biofilm-forming isolates ( $n = 6$ ). The disinfectant resistance ability was expressed as the percentage (%) compared the OD values of disinfectant challenge group to that of the control experiment without disinfection.
